# Supplementary material
Source: Springer Nature journal article supplement (https://www.springermedizin.de/resource/supplementary/12936_2012_2190_MOESM2_ESM.pdf/9542728)

**Percent of under-sevens reporting bed net use in net  
owning households**

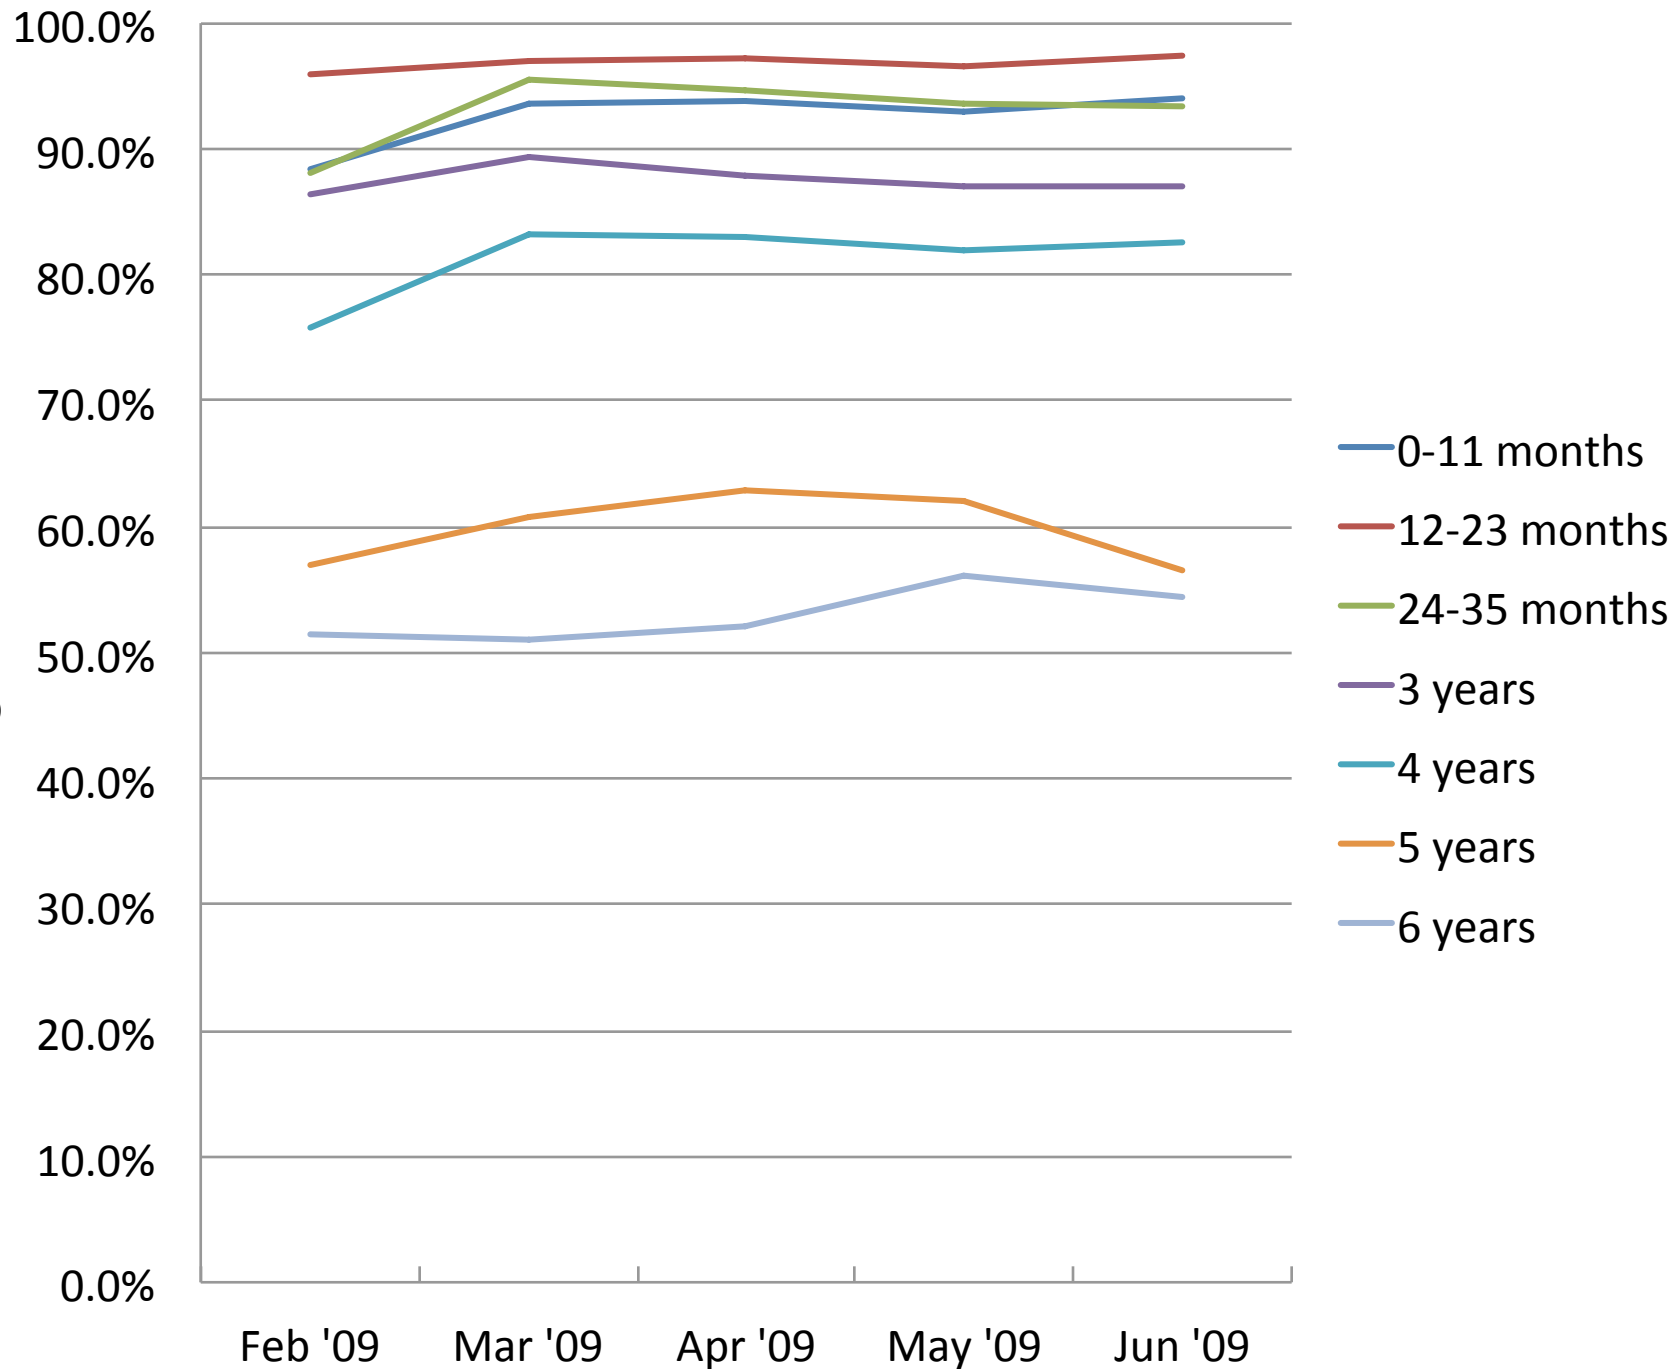

Supplement: MOESM2 [file 9542728]
